# Supplementary material for: An S = 3 cyanide-bridged tetranuclear FeIII2NiII2 square that exhibits slow relaxation of magnetization: synthesis, structure and magnetic properties
Source: Royal Society of Chemistry journal article supplement (doi:10.1039/b925698a), 2010-01-01
Supplement: b925698a.pdf [file b925698a.pdf]

*Supporting Materials for*

**An  $S = 3$  Cyanide-Bridged Tetranuclear  $\text{Fe}^{\text{III}}_2\text{Ni}^{\text{II}}_2$  Square that Exhibits Slow Relaxation of the Magnetization: Synthesis, Structure and Magnetic Property**

**Dayu Wu, Yanjuan Zhang, Wei Huang, and Osamu Sato**

Table S1. The selected bond distances (Å) and bond angles (°) for compound  $1-(\text{ClO}_4)_2$

Figure S1. The temperature dependence of magnetic susceptibility in the form of  $\chi_M T$  versus  $T$  at different field

Figure S2. Out-of-phase component of the  $ac$  susceptibility in zero applied field at different frequencies for  $1-(\text{ClO}_4)_2$ .

Figure S3. Out-of-phase component of the  $ac$  susceptibility for  $1-(\text{ClO}_4)_2$  in 5000 G field at frequencies of 10, 100, 500 1000 and 1500 Hz, respectively.

Table S1. The selected bond distances (Å) and bond angles (°) for compound 1-(ClO<sub>4</sub>)<sub>2</sub>

| Compound 1-(ClO <sub>4</sub> ) <sub>2</sub> |          |
|---------------------------------------------|----------|
| Fe1-C22                                     | 1.905(6) |
| Fe1-C23                                     | 1.906(8) |
| Fe1-C21                                     | 1.915(7) |
| Fe1-N12                                     | 1.958(6) |
| Fe1-N11                                     | 1.967(6) |
| Fe1-N14                                     | 1.970(5) |
| Ni1-N8                                      | 2.047(5) |
| Ni1-N5                                      | 2.057(6) |
| Ni1-N7#                                     | 2.058(6) |
| Ni1-N3                                      | 2.067(6) |
| Ni1-N2                                      | 2.078(6) |
| Ni1-N6                                      | 2.093(6) |
| C22- Fe1- C21                               | 87.9(3)  |
| C23- Fe1- C21                               | 86.2(3)  |
| C22- Fe1- N12                               | 91.8(2)  |
| C23- Fe1- N12                               | 178.2(2) |
| C21- Fe1- N12                               | 93.5(3)  |
| C23- Fe1- N11                               | 92.0(3)  |
| C21- Fe1- N11                               | 177.5(2) |
| N12-Fe1- N11                                | 88.4(2)  |
| C22-Fe1-N14                                 | 178.9(2) |
| C23-Fe1-N14                                 | 93.3(2)  |
| C21-Fe1-N14                                 | 91.0(2)  |
| N11-Fe1-N14                                 | 87.3(2)  |
| N8-Ni1-N5                                   | 90.2(2)  |
| N8-Ni1-N7#                                  | 90.9(2)  |
| N5-Ni1-N7#                                  | 94.6(2)  |
| N8-Ni1-N3                                   | 92.0(2)  |
| N5- Ni1-N3                                  | 175.6(2) |
| N7#-Ni1-N3                                  | 89.1(2)  |
| N8-Ni1-N2                                   | 177.8(3) |
| N5- Ni1-N2                                  | 91.8(3)  |
| N7#-Ni1-N2                                  | 89.8(2)  |
| N3-Ni1-N2                                   | 86.0(3)  |
| N8-Ni1-N6                                   | 90.0(2)  |
| N5-Ni1-N6                                   | 84.8(2)  |
| N7#-Ni1-N6                                  | 179.0(2) |
| N3-Ni1-N6                                   | 91.4(2)  |

Symmetry code: # -2-x, -2-y, 2-z

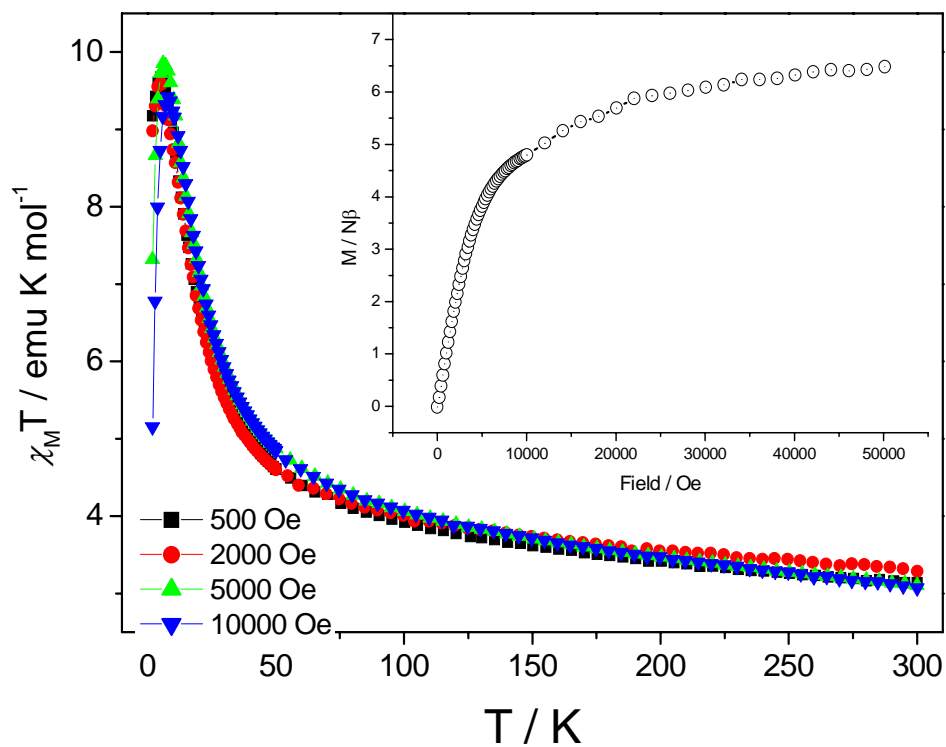

Figure S1. The temperature dependence of magnetic susceptibility in the form of  $\chi_M T$  versus  $T$  at different field. Inset is the field-dependent magnetization of compound  $1-(\text{ClO}_4)_2$  at 2 K.

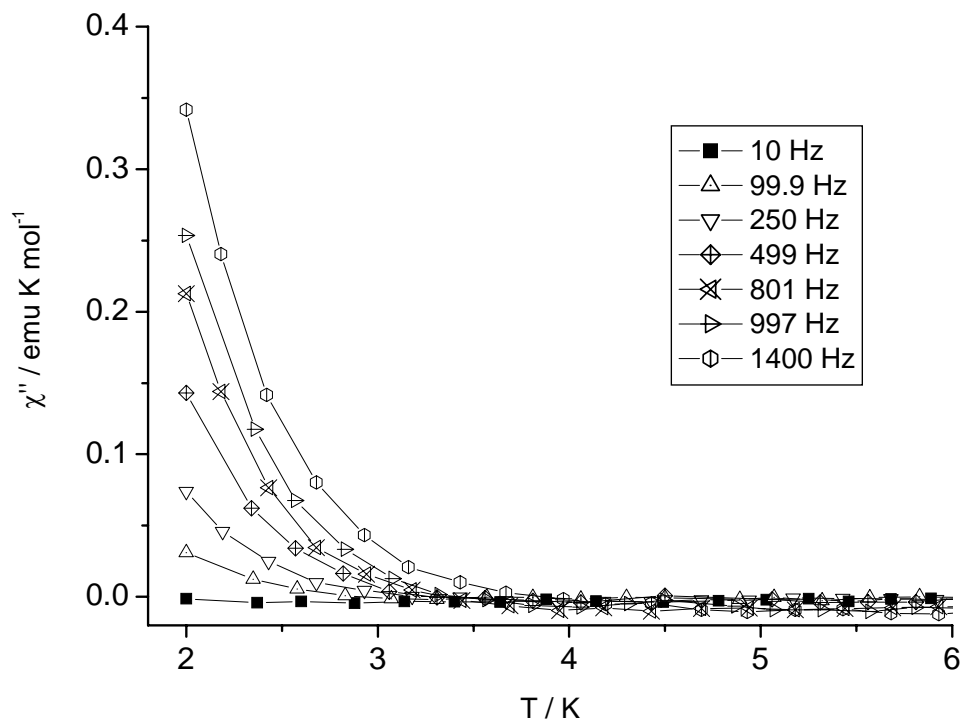

Figure S2. Out-of-phase component of the *ac* susceptibility in zero applied field at different frequencies for  $1-(\text{ClO}_4)_2$ .

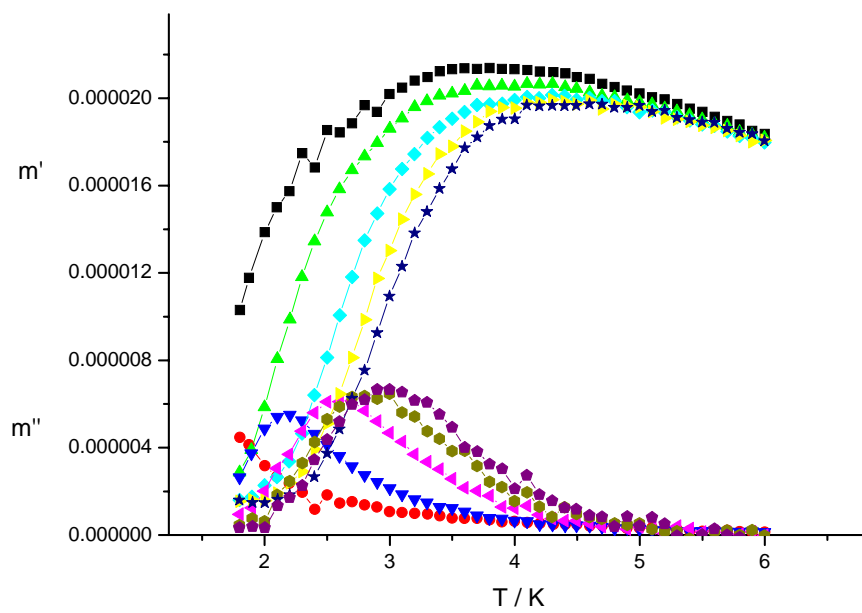

Figure S3. Out-of-phase component of the  $ac$  susceptibility for  $1-(\text{ClO}_4)_2$  in 5000 G field at frequencies of 10, 100, 500 1000 and 1500 Hz, respectively.
